# Supplementary figures and images for: An irregular-shaped homogeneous refractive index model for interpretation of the surface plasmon resonance response from living cell attachment
Source: Royal Society of Chemistry journal article supplement (doi:10.1039/c6ay00524a), 2016-01-01

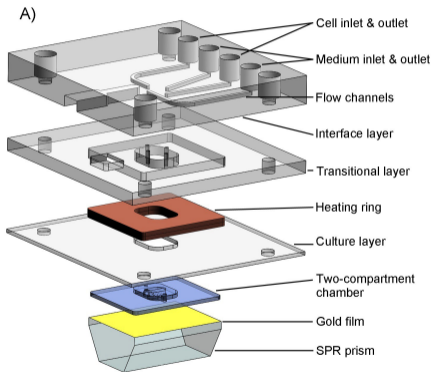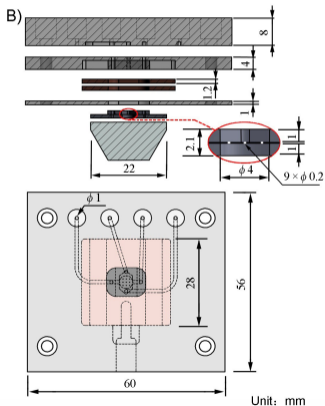

Supplement: c6ay00524a2.pdf [file c6ay00524a2.pdf]
